# Supplementary material for: Enhanced blue photoluminescence and photostability of Cs3Bi2Br9 perovskite quantum dots via surface passivation with silver ions
Source: Royal Society of Chemistry journal article supplement (doi:10.1039/d1ce01006a), 2021-01-01
Supplement: d1ce01006a1.pdf [file d1ce01006a1.pdf]

Supplementary Information

Enhanced blue photoluminescence and photostability of Cs<sub>3</sub>Bi<sub>2</sub>Br<sub>9</sub>  
perovskite quantum dots via surface passivation with silver ions

Tianfeng Li<sup>‡</sup>, Jicun Ma<sup>‡</sup>, Mengdi Qiao, Yanmin Kuang, Yulu He, Xia Ran, Lijun Guo\* and Xiaojuan Wang\*

School of Physics and Electronics, International Joint Research Laboratory of New Energy Materials and Devices of Henan Province, Henan University, Kaifeng 475004, P. R. China.

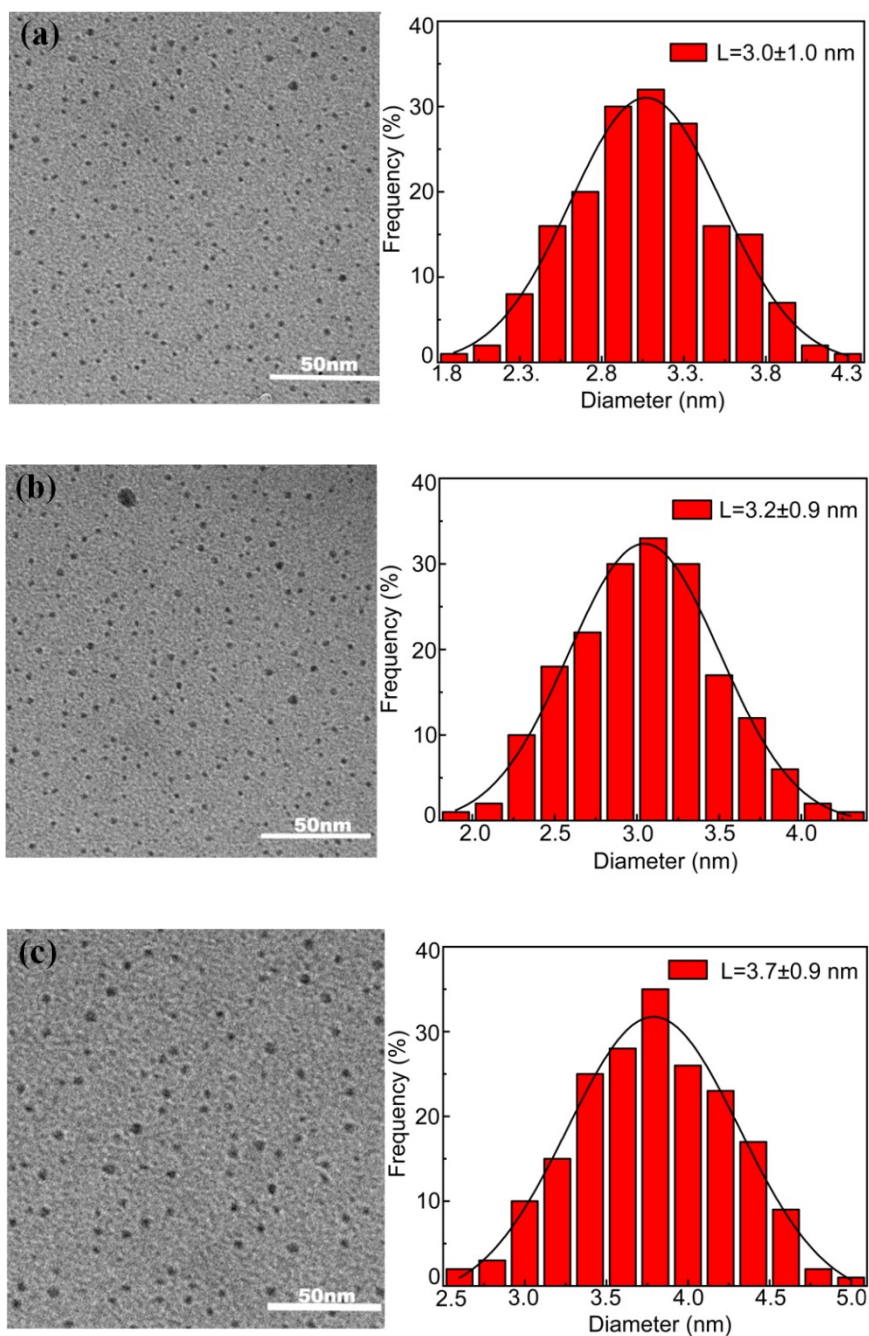

Fig. S1 (a) Typical transmission electron microscopy (TEM) and analysis of size distribution of Cs<sub>3</sub>Bi<sub>2</sub>Br<sub>9</sub> QDs synthesized in 0°C (a), 27°C (b) and 50°C (c).

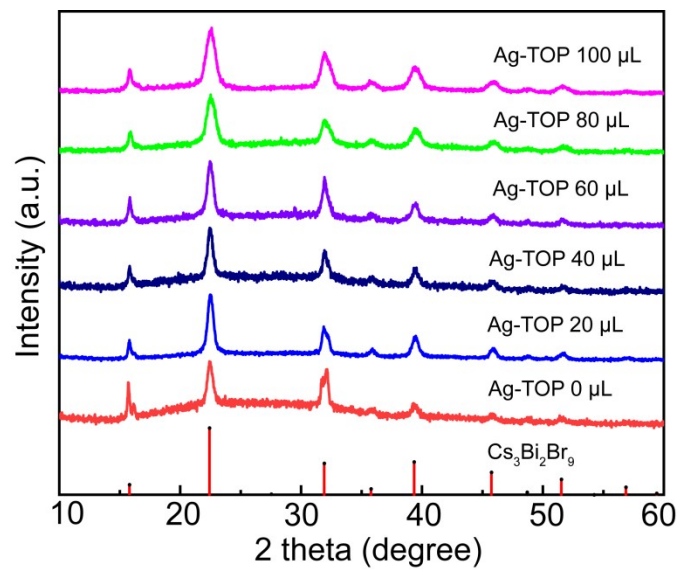

Fig. S2 XRD pattern for  $\text{Cs}_3\text{Bi}_2\text{Br}_9$  and Ag- $\text{Cs}_3\text{Bi}_2\text{Br}_9$  QDs with different amount Ag precursor.
